# Supplementary material for: Boron-based ternary MgTa2B6 cluster: a turning nanoclock with dynamic structural fluxionality
Source: Royal Society of Chemistry journal article supplement (doi:10.1039/d3cp05826c), 2024-01-01

## SUPPLEMENTARY INFORMATION

### Boron-Based Ternary MgTa<sub>2</sub>B<sub>6</sub> Cluster: A Turning Nanoclock with Dynamic Structural Fluxionality

Fang-Lin Liu, Jin-Chang Guo, and Hua-Jin Zhai\*

*Nanocluster Laboratory, Institute of Molecular Science, Shanxi University, Taiyuan 030006, China*

\*E-mail: hj.zhai@sxu.edu.cn

#### Supplementary Information – Part I

- Table S1** Cartesian coordinates for optimized global-minimum (GM) and transition-state (TS) structures of MgTa<sub>2</sub>B<sub>6</sub> cluster at the PBE0-D3BJ/def2-TZVP level.
- Table S2** Orbital composition analysis for occupied canonical molecular orbitals (CMOs) of GM (**1**, C<sub>s</sub>, <sup>1</sup>A') MgTa<sub>2</sub>B<sub>6</sub> cluster. Main components are highlighted in bold.
- Table S3** Orbital composition analysis for occupied CMOs of TS (**1'**, C<sub>s</sub>, <sup>1</sup>A') MgTa<sub>2</sub>B<sub>6</sub> cluster. Main components are highlighted in bold.
- Table S4** Calculated NICS<sub>zz</sub> and NICS (shown in *italics* in brackets) of GM (**1**, C<sub>s</sub>, <sup>1</sup>A') MgTa<sub>2</sub>B<sub>6</sub> cluster at the PBE0/Ta/def2-TZVP/B,Mg/6-311+G(d) level. These values are calculated at the center of B<sub>6</sub> ring or B<sub>4</sub> trapezoid, as well as at 1 Å above the center.
- Figure S1** Optimized geometric structures for the top 20 low-lying isomers of MgTa<sub>2</sub>B<sub>6</sub> cluster at the PBE0-D3BJ/def2-TZVP level along with their relative energies (in

*italics*), including corrections for the zero-point energies (ZPEs). Relative energies are also listed at the single-point CCSD(T)/def2-TZVP//PBE0-D3BJ/def2-TZVP level with ZPE corrections, as well as at the single-point CCSD(T)/def2-TZVP//BP86-D3BJ/def2-TZVP level (in brackets) with ZPE corrections. All energies are shown in kcal mol<sup>-1</sup>.

- Figure S2** Calculated bond distances (in Å; black color) and Wiberg bond indices (WBIs; in blue color) for GM MgTa<sub>2</sub>B<sub>6</sub> cluster at the PBE0-D3BJ/def2-TZVP level. The WBI values are obtained from the natural bond orbital (NBO) analysis.
- Figure S3** Calculated (a) bond distances (in Å; black color) and (b) WBIs (blue color) for TS MgTa<sub>2</sub>B<sub>6</sub> cluster. The WBIs are obtained from the NBO analysis.
- Figure S4** Pictures of occupied CMOs of GM (**1**, C<sub>s</sub>, <sup>1</sup>A') MgTa<sub>2</sub>B<sub>6</sub> cluster, sorted to five subsets. (a) Six CMOs for skeleton, localized B–B σ bonds along the peripheral B<sub>6</sub> ring. (b) Three delocalized π CMOs; that is, the π sextet. (c) Three delocalized σ CMOs. (d) Two Ta 5d-based CMOs that are approximately Ta–Ta nonbonding, with secondary d-p σ bonding. (e) One σ bond within the Ta<sub>8</sub>–Mg<sub>9</sub> unit (see Fig. 1(a) for atom labels), as well as the lowest unoccupied molecular orbital (LUMO). Subsets (b) and (c) collectively render the MgTa<sub>2</sub>B<sub>6</sub> cluster 6π/6σ double aromaticity.
- Figure S5** Calculated natural atomic charges (in |e|) of a model D<sub>6h</sub> CB<sub>6</sub><sup>2-</sup> cluster from the NBO analysis at the PBE0-D3BJ/def2-TZVP level.
- Figure S6** An alternative chemical bonding scheme for GM (**1**, C<sub>s</sub>, <sup>1</sup>A') MgTa<sub>2</sub>B<sub>6</sub> cluster on the basis of adaptive natural density partitioning (AdNDP) analysis. Occupation numbers (ONs) are indicated.
- Figure S7** Isosurfaces of electron localization functions (ELFs) for GM MgTa<sub>2</sub>B<sub>6</sub> cluster. (a) At the B<sub>6</sub> plane. (b) At the plane of B<sub>3</sub>–Ta<sub>8</sub>–B<sub>6</sub>–Ta<sub>7</sub> rhombus.
- Figure S8** Pictures of occupied CMOs of TS (**1'**, C<sub>s</sub>, <sup>1</sup>A') structure of MgTa<sub>2</sub>B<sub>6</sub> cluster. (a) Six CMOs for localized B–B σ bonds along the peripheral B<sub>6</sub> ring. (b) Three

delocalized  $\pi$  CMOs. (c) Three delocalized  $\sigma$  CMOs. (d) Two Ta 5d-based CMOs that are approximately Ta–Ta nonbonding. (e) One  $\sigma$  bond within the Ta8–Mg9 unit, as well as the LUMO.

**Figure S9** AdNDP bonding scheme for the TS structure of  $\text{MgTa}_2\text{B}_6$  cluster. The ONs are shown. This bonding scheme is to be compared to that of GM  $\text{MgTa}_2\text{B}_6$  cluster as shown in Fig. 4.

## Supplementary Information – Part II

**A short movie** extracted from the Born-Oppenheimer molecular dynamics (BOMD) simulation for GM  $\text{MgTa}_2\text{B}_6$  cluster. The simulation was performed at near room temperature (300 K) for a time duration of 60 ps. The movie roughly covers a time span of 12 ps.

**Table S1** Cartesian coordinates for optimized global-minimum (GM) and transition-state (TS) structures of MgTa<sub>2</sub>B<sub>6</sub> cluster at the PBE0-D3BJ/def2-TZVP level.

**1** (GM, C<sub>s</sub>, <sup>1</sup>A')

|    |             |             |             |
|----|-------------|-------------|-------------|
| B  | 0.79142705  | 1.39983409  | 0.00265237  |
| B  | -0.82052483 | 1.38297912  | 0.00265237  |
| B  | -1.59640516 | -0.01904227 | 0.00592409  |
| B  | -0.78469099 | -1.39741379 | -0.00857646 |
| B  | 0.81373964  | -1.38070020 | -0.00857646 |
| B  | 1.59645430  | 0.01434306  | 0.00592409  |
| Ta | 0.00001937  | -0.00185289 | -1.47094945 |
| Ta | 0.00001937  | -0.00185289 | 1.51355369  |
| Mg | -0.02720039 | 2.60135261  | 2.67545797  |

**1'** (TS, C<sub>s</sub>, <sup>1</sup>A')

|    |             |             |             |
|----|-------------|-------------|-------------|
| B  | 0.01759854  | 1.61053394  | -0.00964987 |
| B  | -1.38027195 | 0.81283623  | 0.00512060  |
| B  | -1.39059116 | -0.78526101 | -0.01234223 |
| B  | -0.01753949 | -1.60512975 | 0.02409312  |
| B  | 1.37309985  | -0.81546027 | -0.01234223 |
| B  | 1.39770421  | 0.78248087  | 0.00512060  |
| Ta | 0.00000293  | 0.00026830  | 1.47148794  |
| Ta | 0.00000293  | 0.00026830  | -1.51217717 |
| Mg | 0.02827561  | 2.58764807  | -2.74741123 |

**Table S2** Orbital composition analysis for occupied canonical molecular orbitals (CMOs) of GM (**1**,  $C_s$ ,  $^1A'$ )  $MgTa_2B_6$  cluster. Main components are highlighted in bold.

| Subsystem             | CMO                                                                                                      | $B_6$ (%)                                                                                            |                  | $Ta_2$ (%)           |                      | $Mg$ (%)    |                 |
|-----------------------|----------------------------------------------------------------------------------------------------------|------------------------------------------------------------------------------------------------------|------------------|----------------------|----------------------|-------------|-----------------|
|                       |                                                                                                          | s/p                                                                                                  | total            | s/p/d                | total                | s/p         | total           |
| B–B<br>2c-2e $\sigma$ | 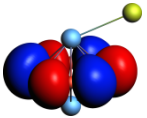<br>HOMO–7 ( $a'$ )     | 0.2/ <b>96.7</b>                                                                                     | <b>96.9</b>      | 0.0/0.1/0.4          | 0.5                  | 0.2/0.0     | 0.2             |
|                       | <br>HOMO–10 ( $a''$ )   | <b>23.4/54.9</b>                                                                                     | <b>78.3</b>      | 0.0/0.0/19.8         | 19.8                 | 0.0/0.0     | 0.0             |
|                       | <br>HOMO–11 ( $a'$ )    | <b>22.7/54.9</b>                                                                                     | <b>77.6</b>      | 0.1/0.2/ <b>20.0</b> | <b>20.3</b>          | 0.3/0.0     | 0.3             |
|                       | <br>HOMO–12 ( $a''$ ) | <b>36.0/27.7</b>                                                                                     | <b>63.7</b>      | 0.0/4.6/ <b>25.5</b> | <b>30.1</b>          | 0.0/0.0     | 0.0             |
|                       | <br>HOMO–13 ( $a'$ )  | <b>36.0/27.6</b>                                                                                     | <b>63.6</b>      | 0.0/4.8/ <b>25.3</b> | <b>30.1</b>          | 0.1/0.1     | 0.2             |
|                       | <br>HOMO–14 ( $a'$ )  | <b>48.5/18.6</b>                                                                                     | <b>67.1</b>      | 7.3/5.6/4.1          | 17.0                 | 0.2/0.1     | 0.3             |
|                       | Mg–Ta<br>2c-2e $\sigma$                                                                                  | <br>HOMO ( $a'$ ) | 2.0/ <b>22.2</b> | <b>24.2</b>          | 3.9/5.4/ <b>32.5</b> | <b>41.8</b> | <b>30.3/1.9</b> |

|                 |                                                                                                     |                   |             |                      |             |          |      |
|-----------------|-----------------------------------------------------------------------------------------------------|-------------------|-------------|----------------------|-------------|----------|------|
| 6π aromaticity  | 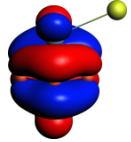<br>HOMO-5 (a'')   | 0.1/ <b>60.7</b>  | <b>60.8</b> | 0.0/2.2/ <b>34.5</b> | <b>36.7</b> | 0.0/0.1  | 0.1  |
|                 | <br>HOMO-6 (a')    | 1.7/ <b>59.1</b>  | <b>60.8</b> | 0.3/3.8/ <b>27.0</b> | <b>31.1</b> | 5.3/0.1  | 5.4  |
|                 | <br>HOMO-9 (a')    | 0.6/ <b>67.5</b>  | <b>68.1</b> | 12.6/2.5/6.5         | <b>21.6</b> | 3.9/0.1  | 4.0  |
| 6σ aromaticity  | <br>HOMO-3 (a'')   | 16.2/ <b>55.0</b> | <b>71.2</b> | 0.0/6.7/ <b>20.1</b> | <b>26.8</b> | 0.0/0.3  | 0.3  |
|                 | <br>HOMO-4 (a')  | 8.2/ <b>36.0</b>  | <b>44.2</b> | 1.0/6.1/ <b>28.8</b> | <b>35.9</b> | 17.9/0.0 | 17.9 |
|                 | <br>HOMO-8 (a')  | <b>23.7/36.8</b>  | <b>60.5</b> | 1.7/0.2/ <b>34.2</b> | <b>36.1</b> | 1.0/0.0  | 1.0  |
| Ta d-based CMOs | <br>HOMO-1 (a'') | 0.2/ <b>28.7</b>  | <b>28.9</b> | 0.0/0.1/ <b>70.2</b> | <b>70.3</b> | 0.0/0.2  | 0.2  |
|                 | <br>HOMO-2 (a')  | 5.7/ <b>35.3</b>  | <b>41.0</b> | 1.2/2.5/ <b>45.3</b> | <b>49.0</b> | 8.3/0.4  | 8.7  |

**Table S3** Orbital composition analysis for occupied CMOs of TS ( $1'$ ,  $C_s$ ,  $^1A'$ )  $MgTa_2B_6$  cluster. Main components are highlighted in bold.

| Subsystem             | CMO                                                                                                      | $B_6$ (%)                                                                                            |                  | $Ta_2$ (%)           |                      | Mg (%)      |                 |
|-----------------------|----------------------------------------------------------------------------------------------------------|------------------------------------------------------------------------------------------------------|------------------|----------------------|----------------------|-------------|-----------------|
|                       |                                                                                                          | s/p                                                                                                  | total            | s/p/d                | total                | s/p         | total           |
| B–B<br>2c-2e $\sigma$ | 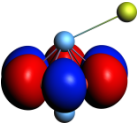<br>HOMO-7 ( $a''$ )    | 0.0/ <b>97.7</b>                                                                                     | <b>97.7</b>      | 0.0/0.0/0.1          | 0.1                  | 0.0/0.0     | 0.0             |
|                       | <br>HOMO-10 ( $a''$ )   | <b>23.2/55.2</b>                                                                                     | <b>78.4</b>      | 0.0/0.0/19.7         | 19.7                 | 0.0/0.0     | 0.0             |
|                       | <br>HOMO-11 ( $a'$ )   | <b>23.2/54.4</b>                                                                                     | <b>77.6</b>      | 0.1/0.1/ <b>20.2</b> | <b>20.4</b>          | 0.2/0.0     | 0.2             |
|                       | <br>HOMO-12 ( $a''$ ) | <b>36.0/27.7</b>                                                                                     | <b>63.7</b>      | 0.0/4.6/ <b>25.5</b> | <b>30.1</b>          | 0.0/0.0     | 0.0             |
|                       | <br>HOMO-13 ( $a'$ )  | <b>36.1/27.5</b>                                                                                     | <b>63.6</b>      | 0.0/4.7/ <b>25.4</b> | <b>30.1</b>          | 0.1/0.1     | 0.2             |
|                       | <br>HOMO-14 ( $a'$ )  | <b>48.5/18.6</b>                                                                                     | <b>67.1</b>      | 7.3/5.6/4.1          | 17.0                 | 0.2/0.1     | 0.3             |
|                       | Mg–Ta<br>2c-2e $\sigma$                                                                                  | <br>HOMO ( $a'$ ) | 2.0/ <b>23.1</b> | <b>25.1</b>          | 3.5/5.0/ <b>35.3</b> | <b>43.8</b> | <b>27.8/1.6</b> |

|                 |                                                                                                     |                   |             |                      |             |          |      |
|-----------------|-----------------------------------------------------------------------------------------------------|-------------------|-------------|----------------------|-------------|----------|------|
| 6π aromaticity  | 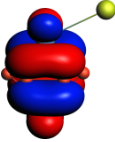<br>HOMO-5 (a'')   | 0.1/ <b>60.6</b>  | <b>60.7</b> | 0.0/2.1/ <b>34.6</b> | <b>36.7</b> | 0.0/0.1  | 0.1  |
|                 | <br>HOMO-6 (a')    | 2.2/ <b>57.5</b>  | <b>59.7</b> | 0.4/4.3/ <b>25.6</b> | <b>30.3</b> | 7.2/0.0  | 7.2  |
|                 | <br>HOMO-9 (a')    | 0.5/ <b>67.4</b>  | <b>67.9</b> | 12.7/2.6/6.3         | <b>21.6</b> | 4.0/0.1  | 4.1  |
| 6σ aromaticity  | <br>HOMO-3 (a'')   | 16.1/ <b>55.1</b> | <b>71.2</b> | 0.0/6.7/ <b>20.2</b> | <b>26.9</b> | 0.0/0.3  | 0.3  |
|                 | <br>HOMO-4 (a')  | 7.3/ <b>35.3</b>  | <b>42.6</b> | 1.1/5.7/ <b>30.2</b> | <b>37.0</b> | 18.3/0.0 | 18.3 |
|                 | <br>HOMO-8 (a')  | <b>23.8/36.5</b>  | <b>60.3</b> | 1.7/0.2/ <b>34.5</b> | <b>36.4</b> | 0.9/0.0  | 0.9  |
| Ta d-based CMOs | <br>HOMO-1 (a'') | 0.2/ <b>28.0</b>  | <b>28.2</b> | 0.0/0.1/ <b>71.0</b> | <b>71.1</b> | 0.0/0.2  | 0.2  |
|                 | <br>HOMO-2 (a')  | 6.3/ <b>36.7</b>  | <b>43.0</b> | 1.3/2.8/ <b>42.0</b> | <b>46.1</b> | 9.2/0.4  | 9.6  |



**Table S4** Calculated NICS<sub>zz</sub> and NICS (shown in *italics* in brackets) of GM (**1**, C<sub>s</sub>, <sup>1</sup>A') MgTa<sub>2</sub>B<sub>6</sub> cluster at the PBE0/Ta/def2-TZVP/B,Mg/6-311+G(d) level. These values are calculated at the center of B<sub>6</sub> ring or B<sub>4</sub> trapezoid, as well as at 1 Å above the center.

|       |                                                                                                          |                                                                                                               |                                                                                                               |                                                                                                                 |                                                                                                                 |
|-------|----------------------------------------------------------------------------------------------------------|---------------------------------------------------------------------------------------------------------------|---------------------------------------------------------------------------------------------------------------|-----------------------------------------------------------------------------------------------------------------|-----------------------------------------------------------------------------------------------------------------|
| R (Å) | 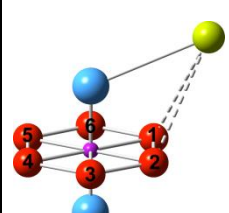<br>B <sub>6</sub> ring | <br>B <sub>4</sub> trapezoid | <br>B <sub>4</sub> trapezoid | <br>B <sub>4</sub> trapezoid | <br>B <sub>4</sub> trapezoid |
| 0.0   | -91.43<br>(-100.03)                                                                                      | -77.20 (-54.11)                                                                                               | -74.01 (-52.78)                                                                                               | -67.00 (-49.28)                                                                                                 | -64.77 (-46.68 <sup>a</sup> )                                                                                   |
| 1.0   | -141.14<br>(+57.84 <sup>b</sup> )                                                                        | -59.94 (+5.11 <sup>b</sup> )                                                                                  | -52.62 (+7.73 <sup>b</sup> )                                                                                  | -39.08 (+10.35 <sup>b</sup> )                                                                                   | -36.18 (+9.51 <sup>b</sup> )                                                                                    |

<sup>a</sup> The dissected contributions from a subset of CMOs to the total NICS value can be evaluated using the NBO 6.0 package. As an example, we shall analyze a point located 0.5 Å below the center of B<sub>3</sub>B<sub>4</sub>B<sub>5</sub>B<sub>6</sub> trapezoid. Here the total NICS value is highly negative (-39.62 ppm), to which the delocalized 6π and 6σ frameworks (Fig. S4(b) and S4(c)) contribute by 74.5% collectively. To be specific, the three delocalized σ CMOs have a contribution of -19.54 ppm, as compared to -10.03 ppm from three delocalized π CMOs. In other words, the delocalized σ and π CMOs account for 49.2% and 25.3% of the total NICS value, respectively. Note that these numbers are merely an example. This analysis further validates the concept of double π/σ aromaticity in the ternary cluster.

<sup>b</sup> These NICS(1) values are not a very reliable indicator of π aromaticity, due to the perturbation of a Ta atom in the vicinity. The Ta atom is 1.49 Å above/below the B<sub>6</sub> plane.

**Figure S1** Optimized geometric structures for the top 20 low-lying isomers of  $\text{MgTa}_2\text{B}_6$  cluster at the PBE0-D3BJ/def2-TZVP level along with their relative energies (in *italics*), including corrections for the zero-point energies (ZPEs). Relative energies are also listed at the single-point CCSD(T)/def2-TZVP//PBE0-D3BJ/def2-TZVP level with ZPE corrections, as well as at the single-point CCSD(T)/def2-TZVP//BP86-D3BJ/def2-TZVP level (in brackets) with ZPE corrections. All energies are shown in  $\text{kcal mol}^{-1}$ .

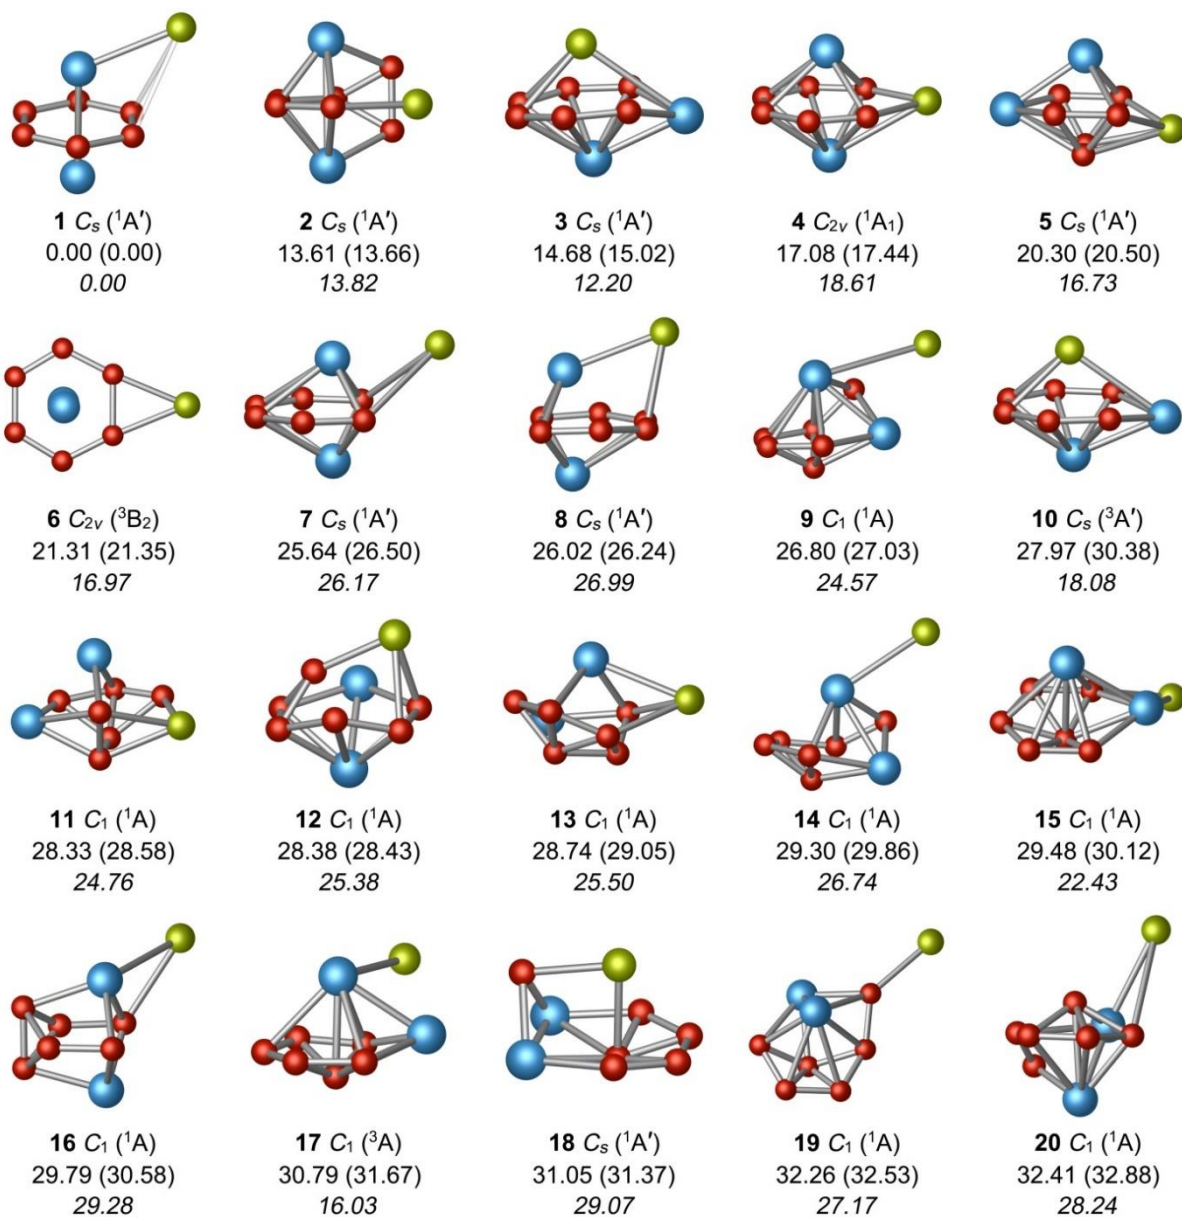

**Figure S2** Calculated bond distances (in Å; black color) and Wiberg bond indices (WBIs; in blue color) for GM MgTa<sub>2</sub>B<sub>6</sub> cluster at the PBE0-D3BJ/def2-TZVP level. The WBI values are obtained from the natural bond orbital (NBO) analysis.

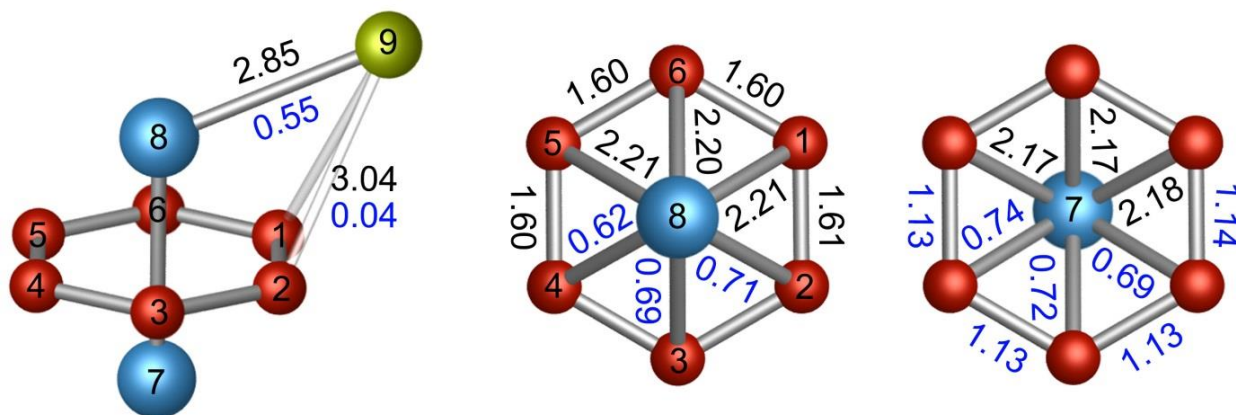

**Figure S3** Calculated (a) bond distances (in Å; black color) and (b) WBIs (blue color) for TS  $\text{MgTa}_2\text{B}_6$  cluster. The WBIs are obtained from the NBO analysis.

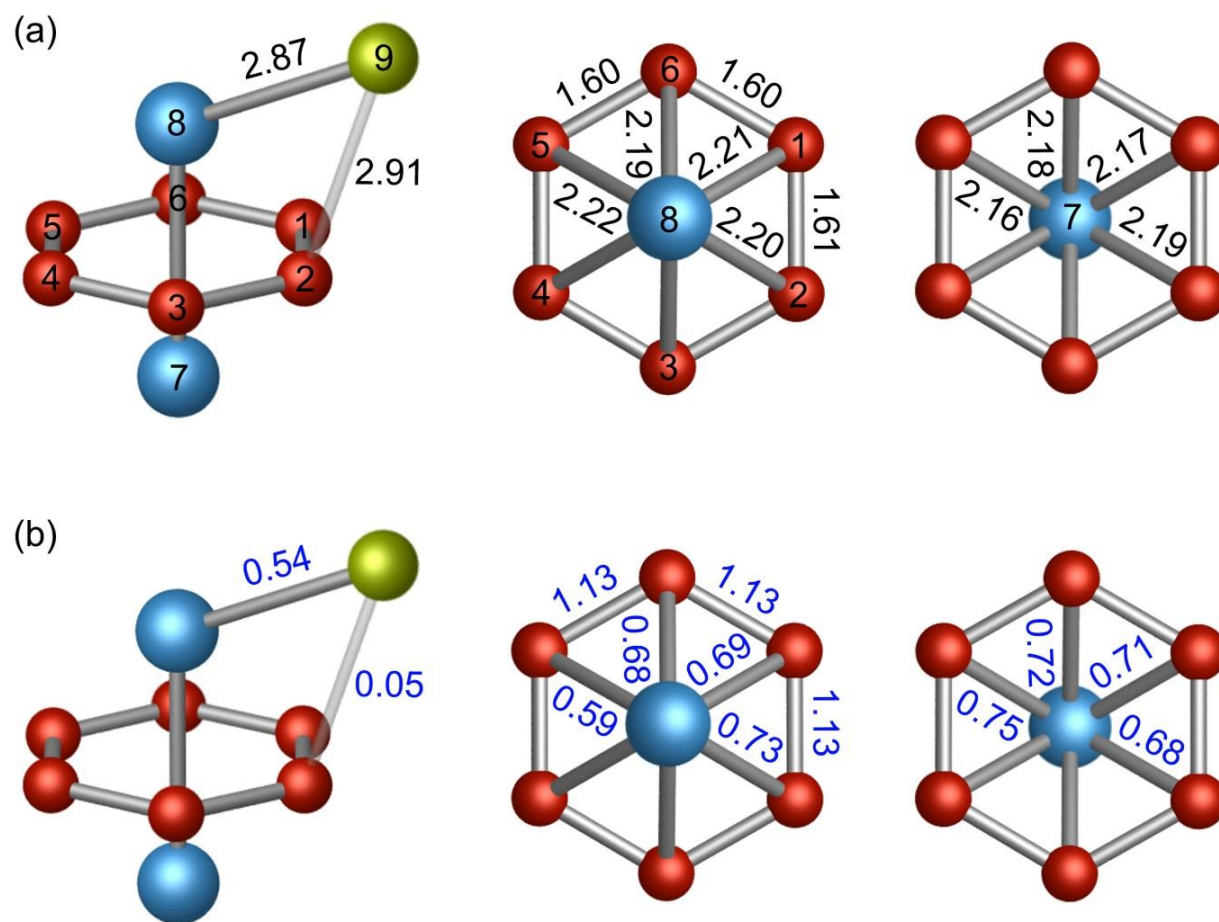

**Figure S4** Pictures of occupied CMOs of GM (**1**,  $C_s$ ,  $^1A'$ )  $MgTa_2B_6$  cluster, sorted to five subsets. (a) Six CMOs for skeleton, localized B–B  $\sigma$  bonds along the peripheral  $B_6$  ring. (b) Three delocalized  $\pi$  CMOs; that is, the  $\pi$  sextet. (c) Three delocalized  $\sigma$  CMOs. (d) Two Ta 5d-based CMOs that are approximately Ta–Ta nonbonding, with secondary d–p  $\sigma$  bonding. (e) One  $\sigma$  bond within the Ta8–Mg9 unit (see Fig. 1(a) for atom labels), as well as the lowest unoccupied molecular orbital (LUMO). Subsets (b) and (c) collectively render the  $MgTa_2B_6$  cluster  $6\pi/6\sigma$  double aromaticity.

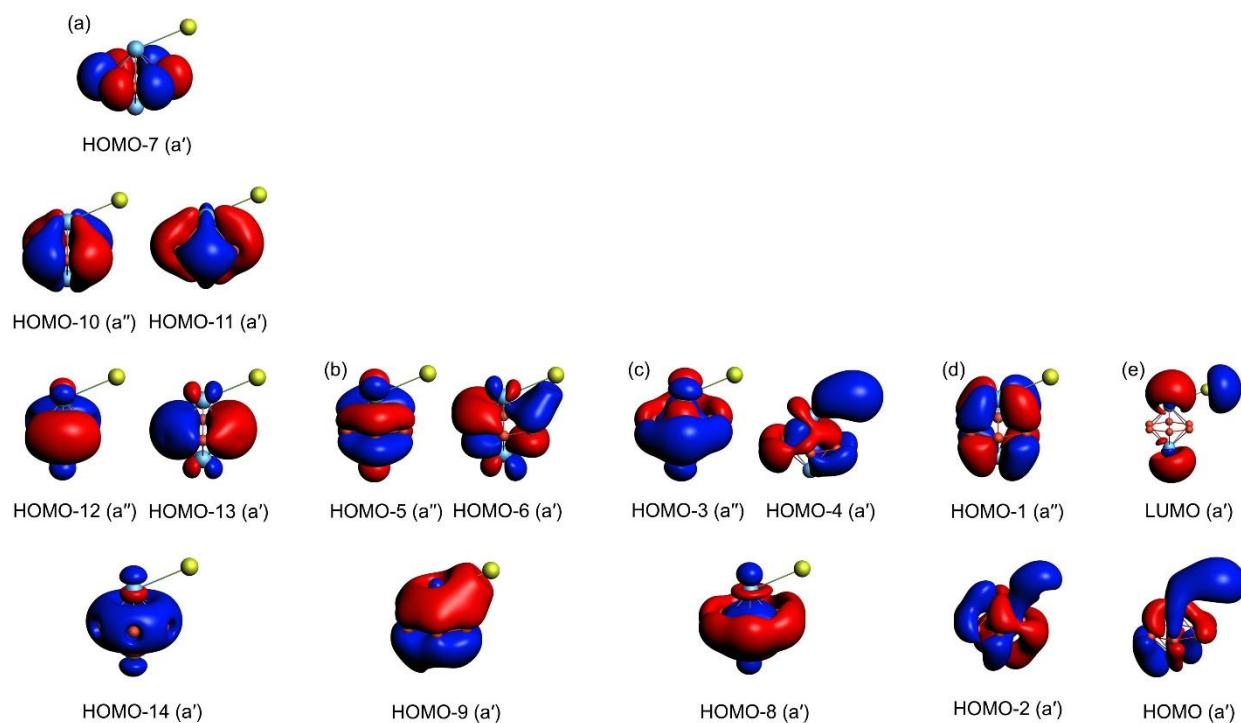

**Figure S5** Calculated natural atomic charges (in |e|) of a model  $D_{6h}$   $\text{CB}_6^{2-}$  cluster from the NBO analysis at the PBE0-D3BJ/def2-TZVP level.

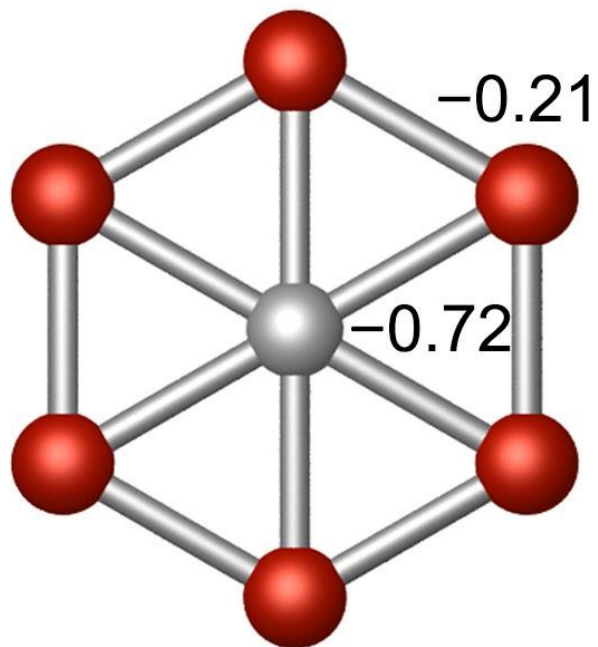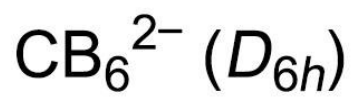

**Figure S6** An alternative chemical bonding scheme for GM (**1**,  $C_s$ ,  $^1A'$ )  $MgTa_2B_6$  cluster on the basis of adaptive natural density partitioning (AdNDP) analysis. Occupation numbers (ONs) are indicated.

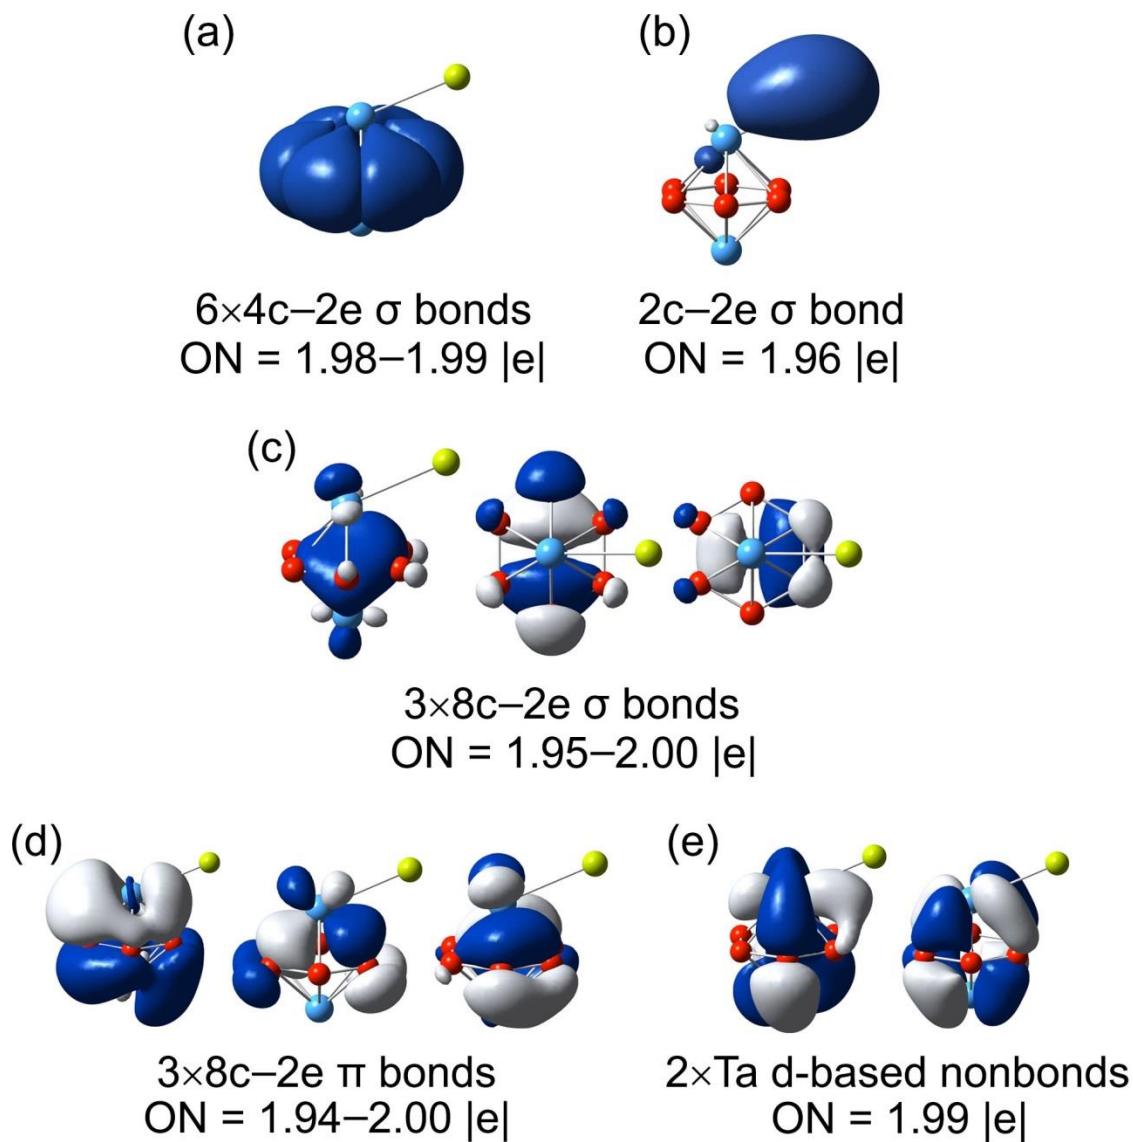

**Figure S7** Isosurfaces of electron localization functions (ELFs) for GM  $\text{MgTa}_2\text{B}_6$  cluster. (a) At the  $\text{B}_6$  plane. (b) At the plane of  $\text{B}_3\text{-Ta}_8\text{-B}_6\text{-Ta}_7$  rhombus.

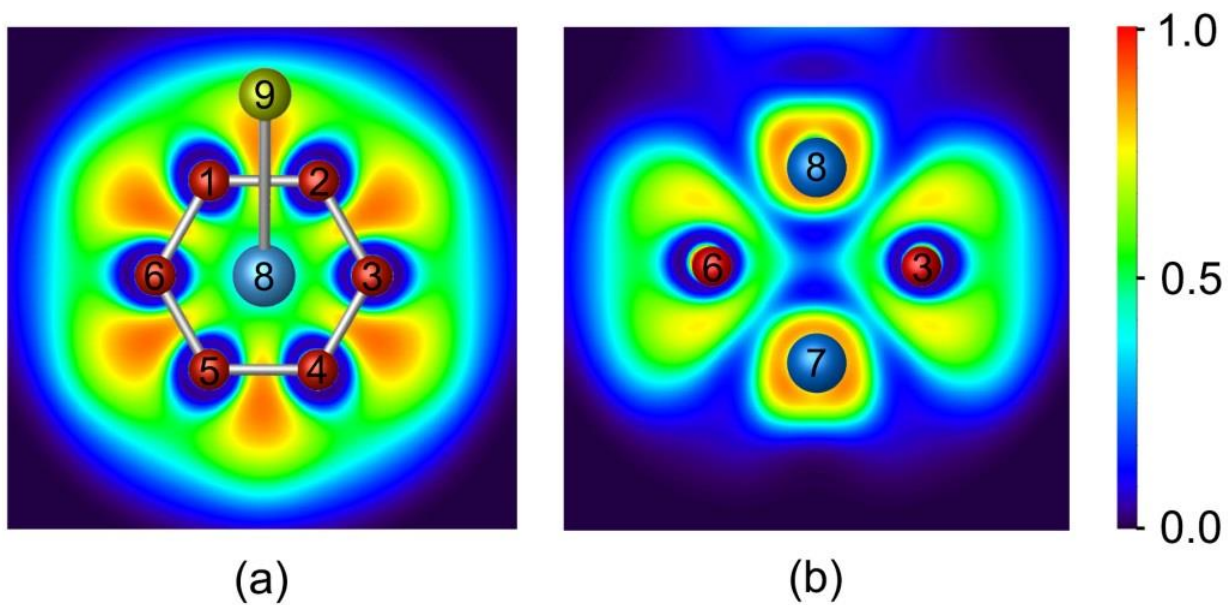



**Figure S8** Pictures of occupied CMOs of TS ( $1'$ ,  $C_s$ ,  $^1A'$ ) structure of  $MgTa_2B_6$  cluster. (a) Six CMOs for localized B–B  $\sigma$  bonds along the peripheral  $B_6$  ring. (b) Three delocalized  $\pi$  CMOs. (c) Three delocalized  $\sigma$  CMOs. (d) Two Ta 5d-based CMOs that are approximately Ta–Ta nonbonding. (e) One  $\sigma$  bond within the Ta8–Mg9 unit, as well as the LUMO.

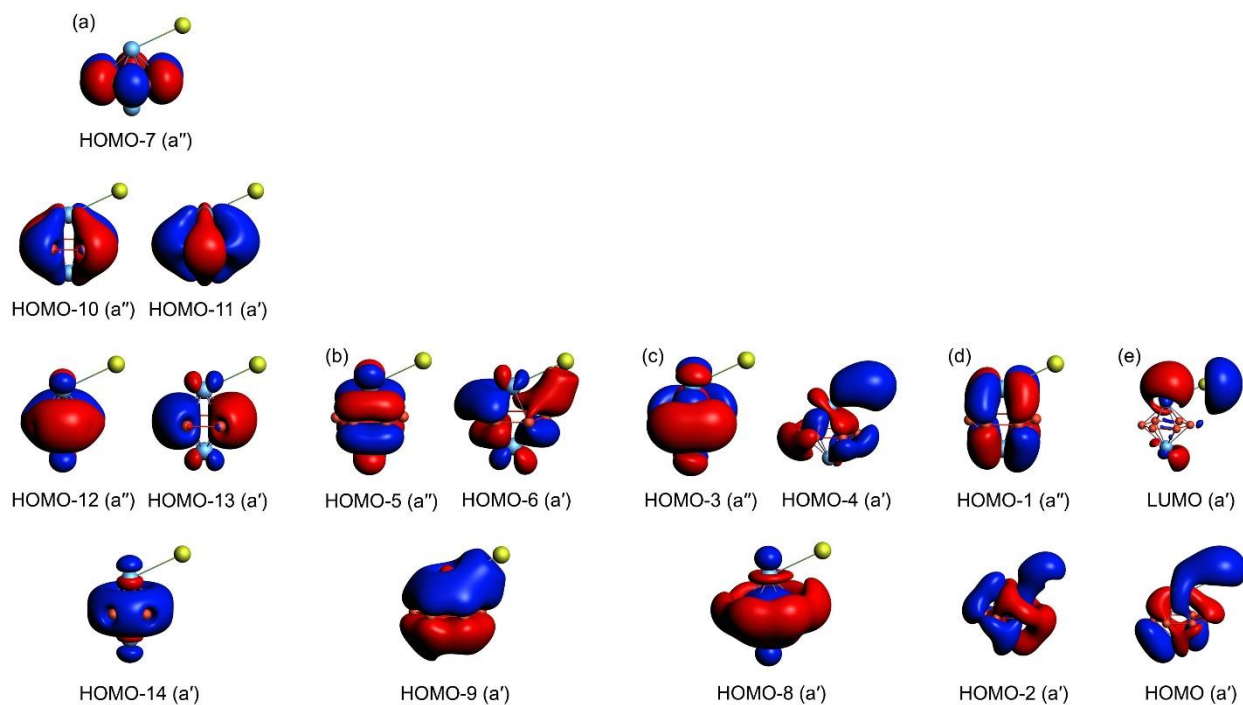

**Figure S9** AdNDP bonding scheme for the TS structure of  $\text{MgTa}_2\text{B}_6$  cluster. The ONs are shown. This bonding scheme is to be compared to that of GM  $\text{MgTa}_2\text{B}_6$  cluster as shown in Fig. 4.

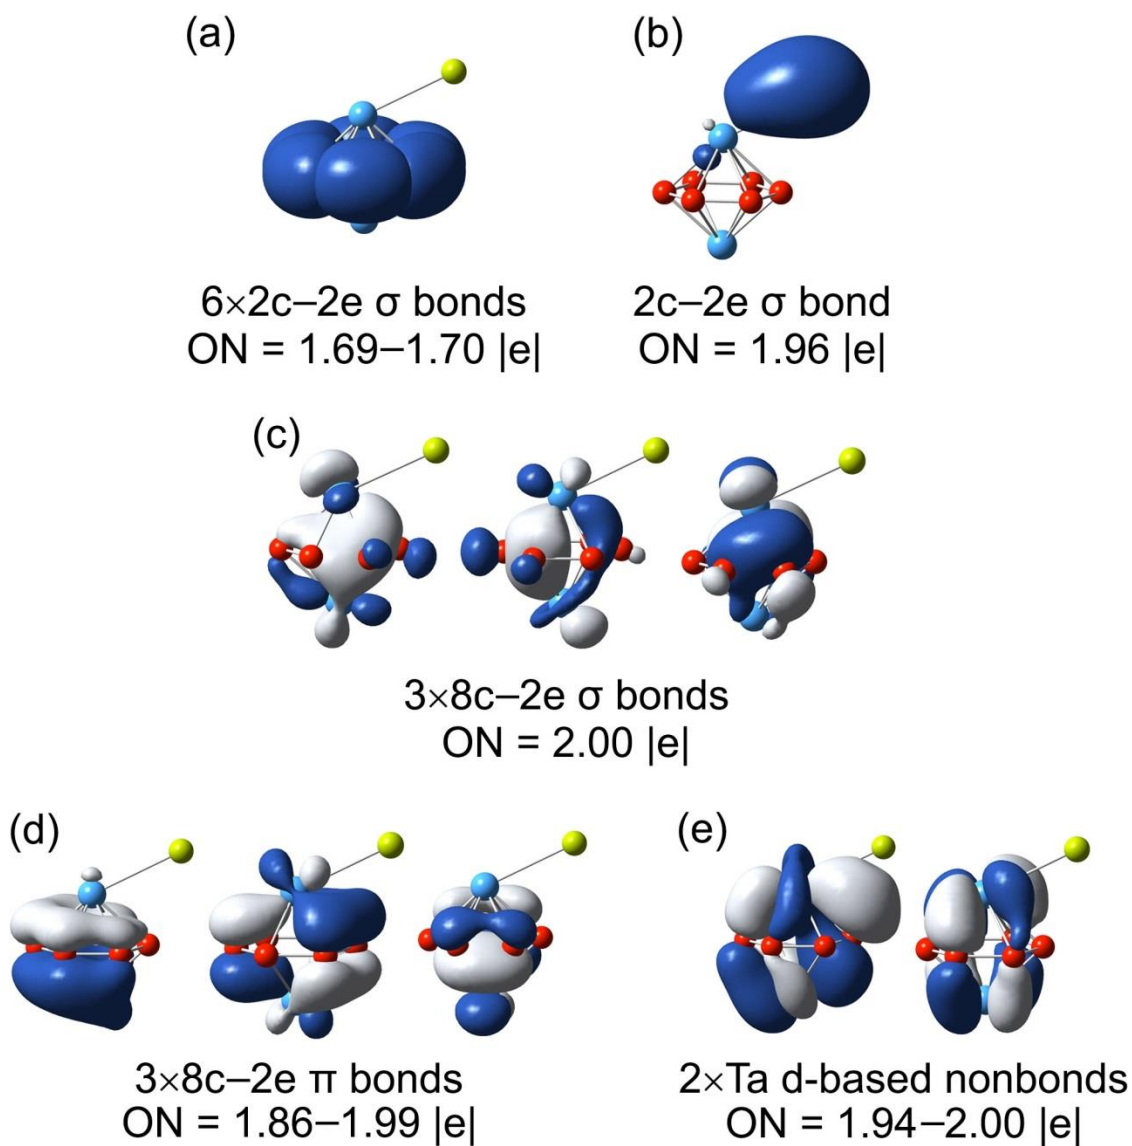

Supplement: d3cp05826c1.pdf [file d3cp05826c1.pdf]
